# Supplementary material for: Bimetallic CoSn nanoparticles anchored on N-doped carbon as antibacterial oxygen reduction catalysts for microbial fuel cells
Source: Royal Society of Chemistry journal article supplement (doi:10.1039/d3nr03504b), 2023-01-01
Supplement: d3nr03504b1.pdf [file d3nr03504b1.pdf]

## Electronic Supporting Information

### **Bimetallic CoSn nanoparticles anchored on N-doped carbon as antibacterial oxygen reduction catalysts for microbial fuel cells**

Liang Li<sup>a,b</sup>, Zequan Liu<sup>c</sup>, Demin Jiang<sup>a</sup>, Min Song<sup>\*c</sup>, Yuqiao Wang<sup>\*a,b</sup>

<sup>a</sup> Research Center for Nano Photoelectrochemistry and Devices, School of Chemistry and Chemical Engineering, Southeast University, Nanjing 211189, China

<sup>b</sup> Yangtze River Delta Carbon Neutrality Strategy Development Institute, Southeast University, Nanjing 210096, China

<sup>c</sup> School of Energy and Environment, Southeast University, Nanjing 210096, China

\*Corresponding author (Email: minsong@seu.edu.cn; yqwang@seu.edu.cn).

#### **Materials characterization**

The X-ray diffraction spectrum (XRD, Ultima IV) was applied to characterize the crystallinity of the synthesized samples in the 2-theta range of 10-80°. The X-ray photoelectron spectroscopy (XPS, K-Aepna, Thermo Fisher Scientific Inc., USA) was used to obtain the information of the element composition of different catalysts. Scanning electron microscope (SEM, FEI inspect F50), transmission electron microscope (TEM, JEM-2100F, JEOL, Japan) and high-resolution TEM (HRTEM, JEM-2100F, JEOL, Japan) were used to observe the morphology of different catalysts.

#### **DFT calculation**

To predict ORR performance, DFT theory calculation was carried out by four elementary steps as follows<sup>20</sup>:

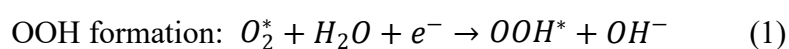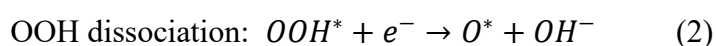

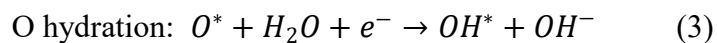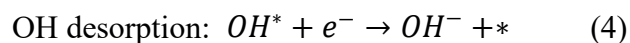

Note that \* denoted the reaction site of materials.

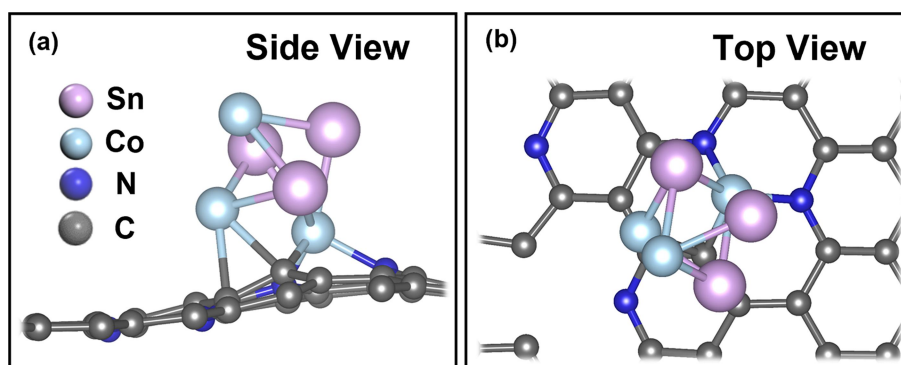

**Fig. S1** Side view (a) and top view (b) of optimized structures of CoSn@NC.

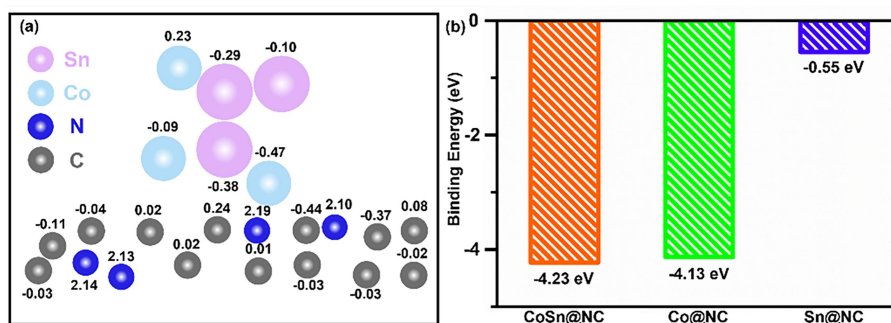

**Fig. S2** (a) Calculated charge of atoms of CoSn@NC, (b) The binding energy of nanoparticles and NC for different catalysts.

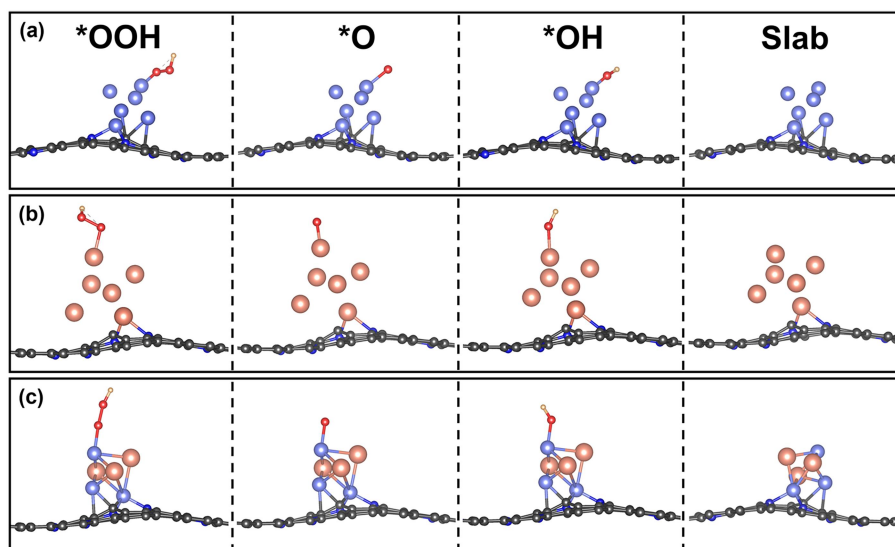

**Fig. S3** Structure models for the adsorbed intermediates \*OOH, \*O, \*OH and slab at the interface of (a) Co@NC, (b) Sn@NC, (c) CoSn@NC in alkaline media during the ORR. (Orange atom: Sn, light blue atom: Co, blue atom: N, gray atom: C, red atom: O, yellow atom: H)

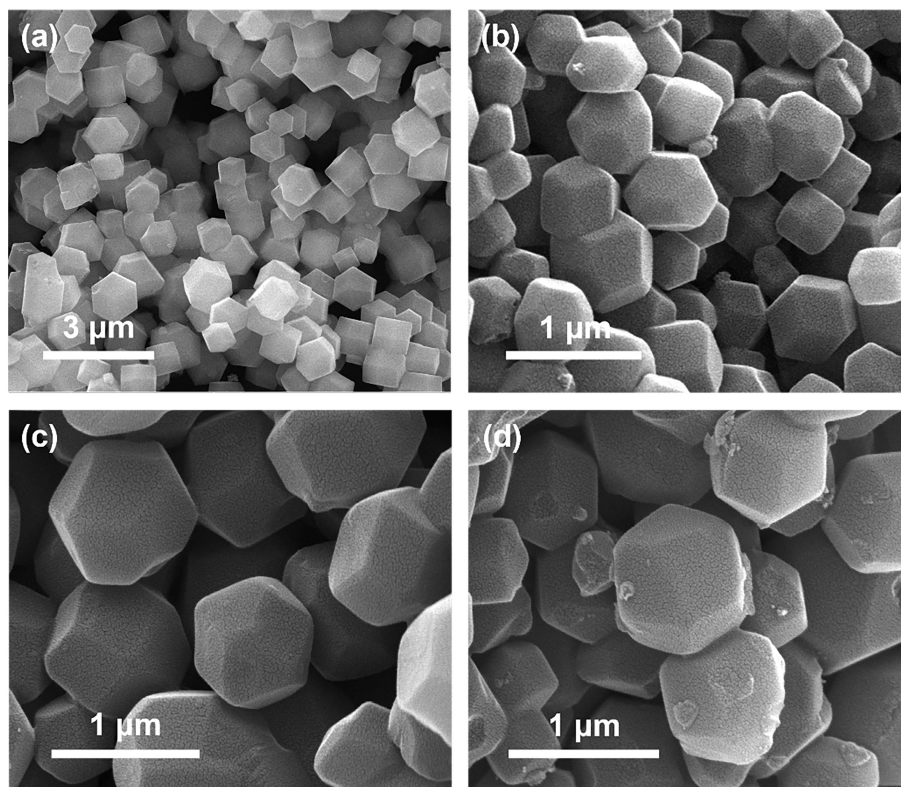

**Fig. S4** SEM images of (a) ZIF precursor, (b) NC, (c) Co@NC, (d) Sn@NC.

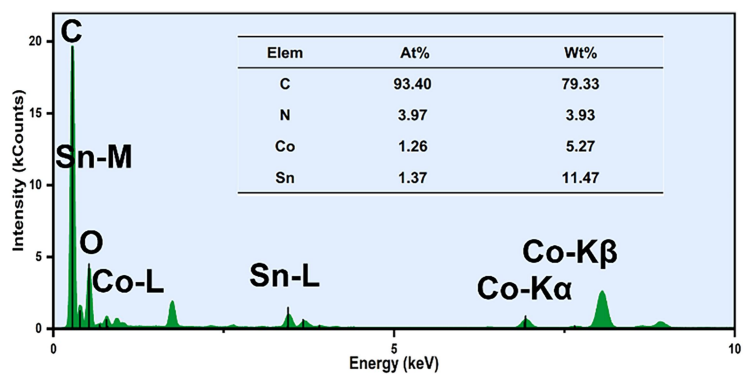

**Fig. S5** EDS patterns of CoSn@NC.

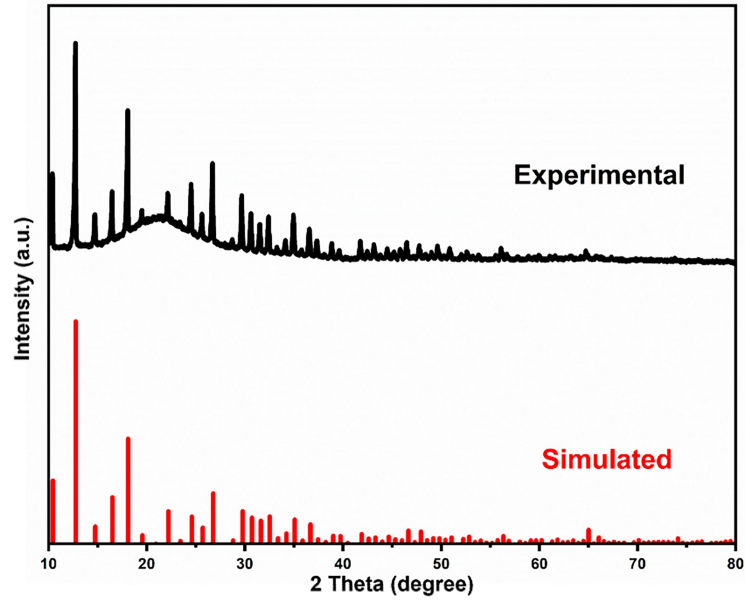

Fig. S6 XRD patterns of ZIF precursor.

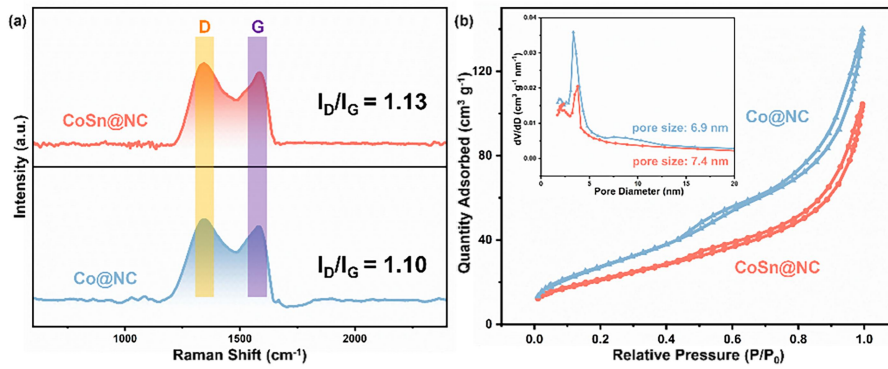

Fig. S7 (a) Raman spectra of Co@NC and CoSn@NC. (b) N<sub>2</sub> adsorption-desorption isotherms and pore size distributions.

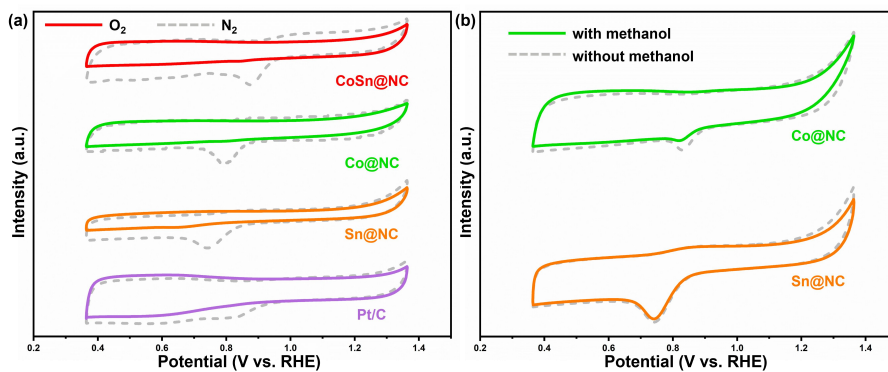

Fig. S8 (a) CV curves of different catalysts in N<sub>2</sub>-saturated 0.1 M KOH. (b) The resistance to poisoning of Co@NC and Sn@NC.

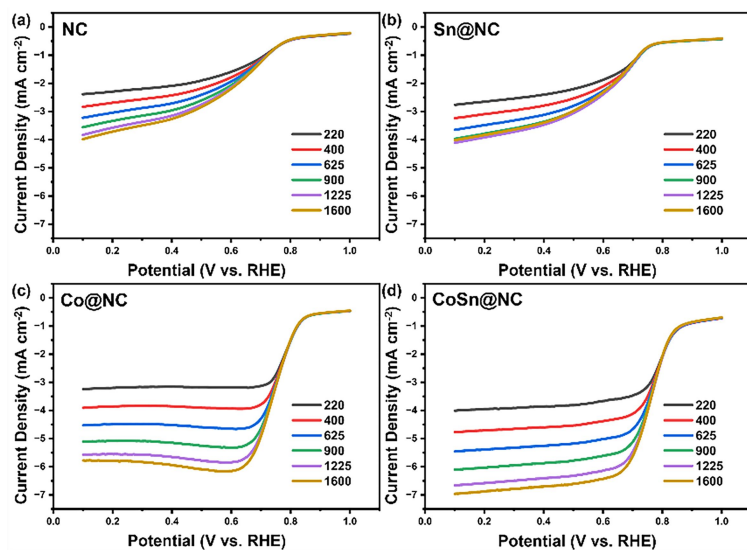

**Fig. S9** LSV curves of catalysts in 0.1 M KOH with different electrode rotation speeds.

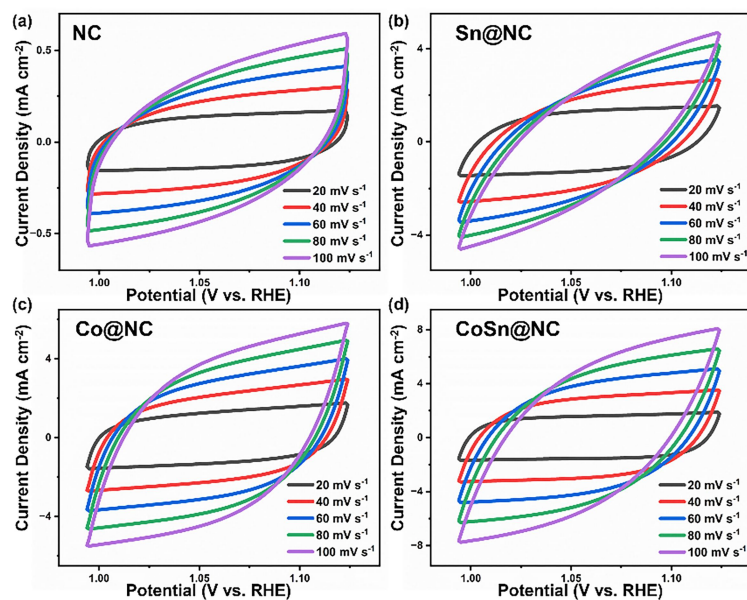

**Fig. S10** CV curves of (a) NC, (b) Sn@NC, (c) Co@NC and (d) CoSn@NC in the non-faradic capacitance current range from 20 to 100 mV s<sup>-1</sup>.

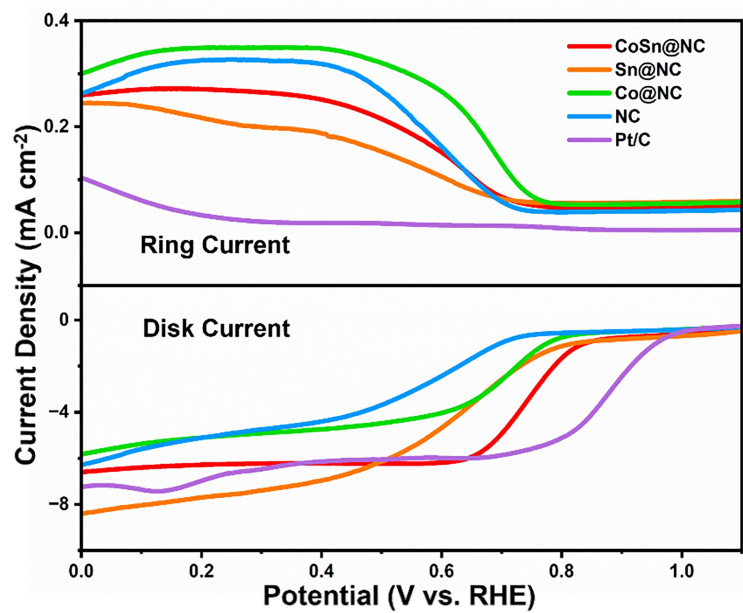

**Fig. S11** Ring currents and disk currents collected in the RRDE systems.

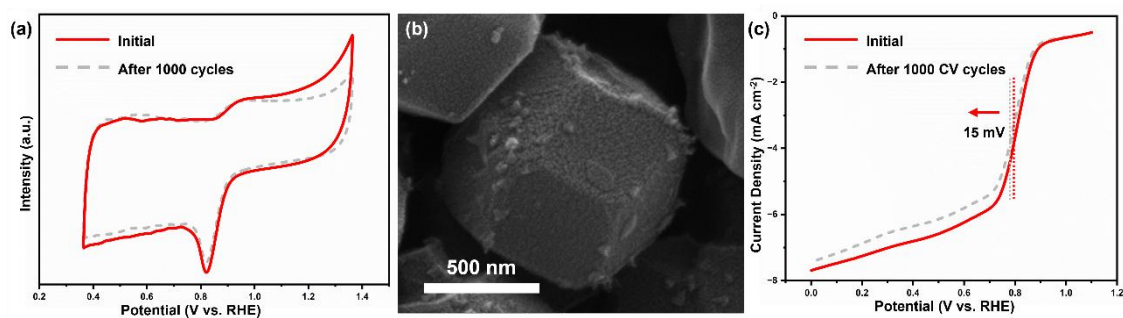

**Fig. S12** CV curves (a), SEM image (b) and LSV curves (c) of CoSn@NC after 1000 cycles.

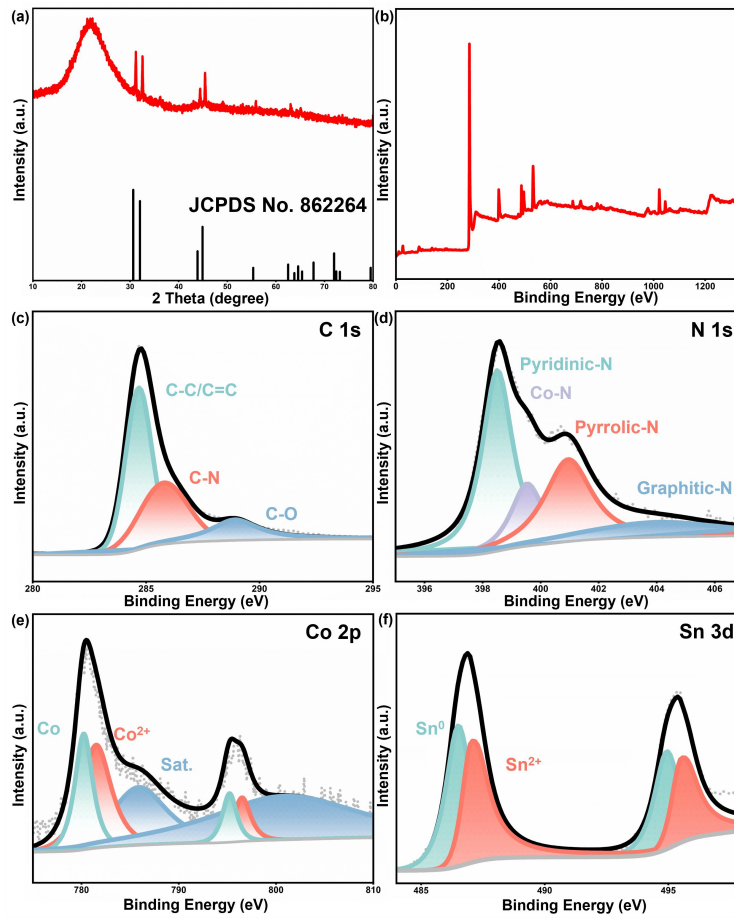

**Fig. S13** XRD patterns (a) and XPS spectra (b-f) of CoSn@NC after 1000 CV cycles.

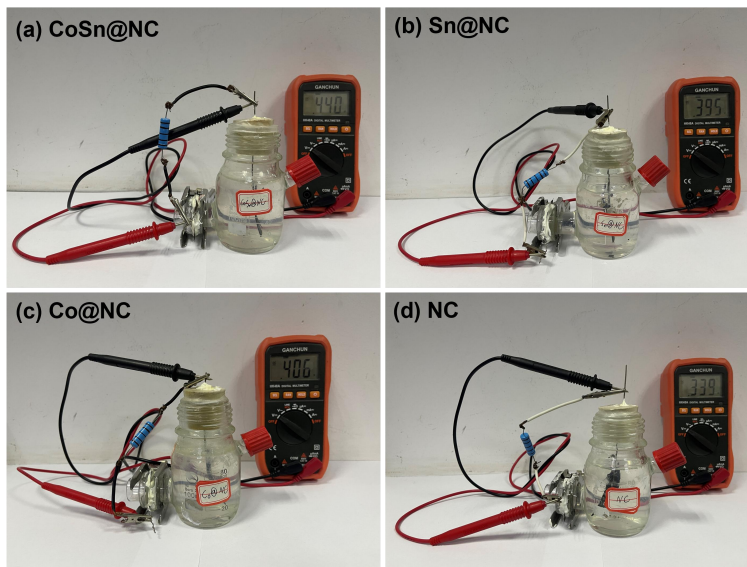

**Fig. S14** The schematic diagrams of MFCs measurement.

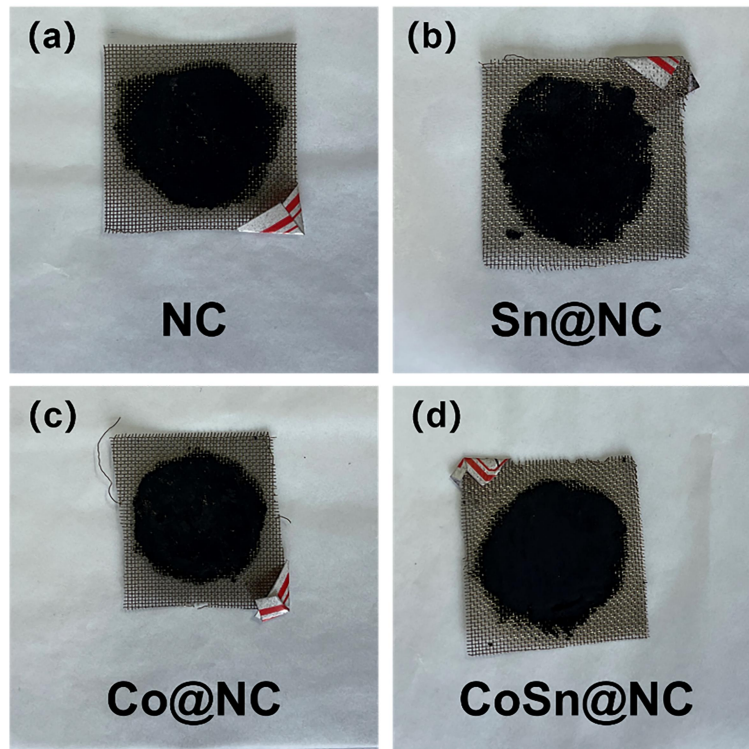

**Fig. S15** Photographs of cathodes.

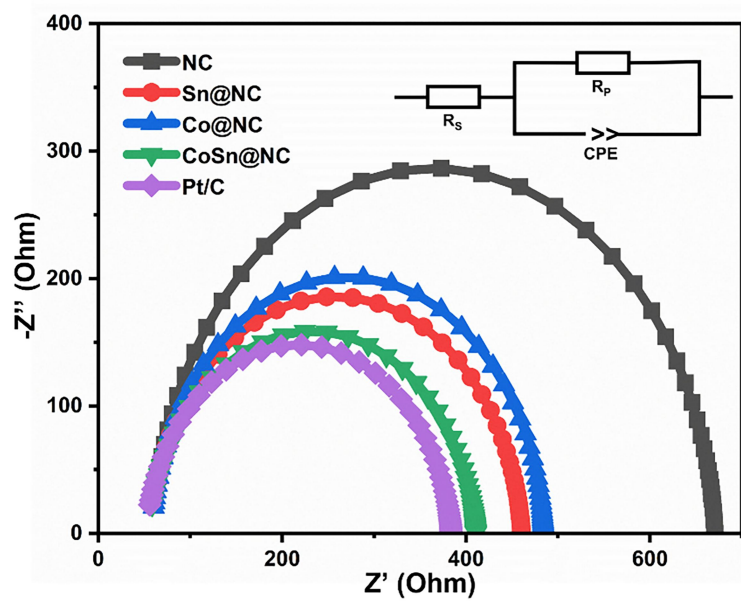

**Fig. S16** Electrochemical impedance spectroscopic Nyquist plot for MFC devices with different catalysts.



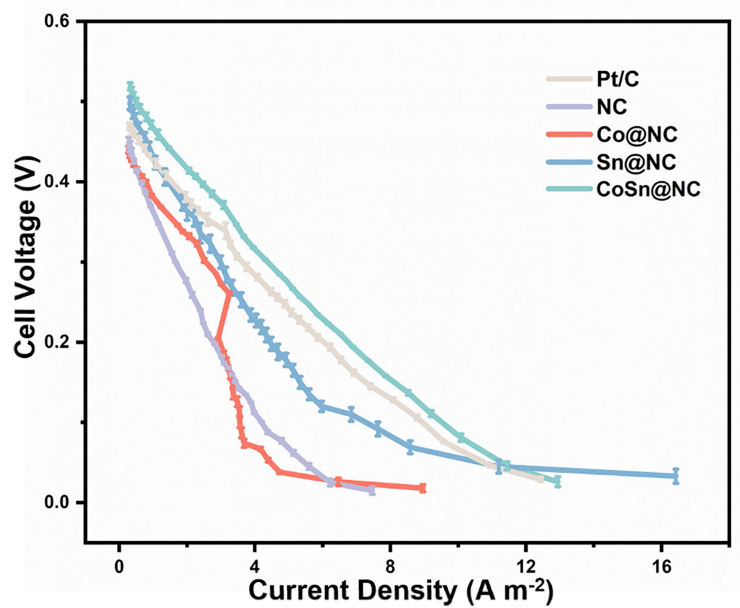

Fig. S17 Polarization curves of the MFCs.

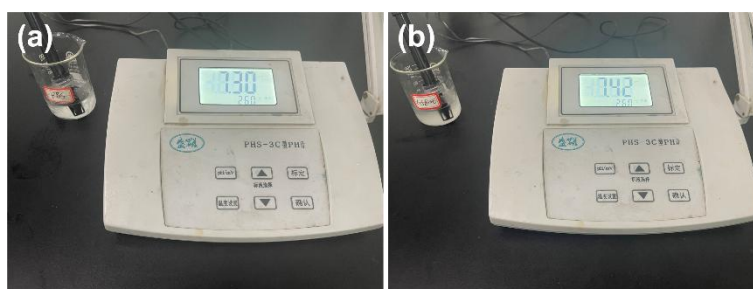

Fig. S18 pH of original PBS buffer (a) and CoSn@NC MFC (b).

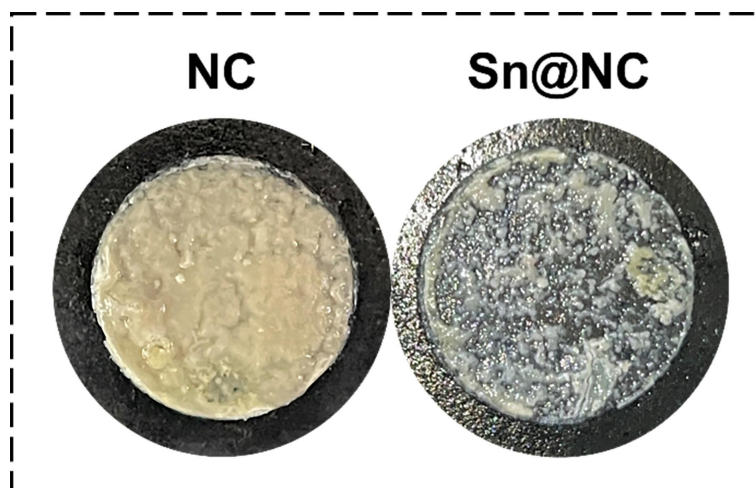

Fig. S19 Biofilm on the cathode surface of NC and Sn@NC after 500 h measurement.

**Table S1.** Relative amounts of pyridinic N, graphitic N, Pyrrolic N and Co-N.

| Catalysts | Pyridinic N (%) | Graphitic N (%) | Pyrrolic N (%) | Co-N (%) |
|-----------|-----------------|-----------------|----------------|----------|
| NC        | 53              | 23              | 25             | /        |
| Sn@NC     | 37              | 24              | 39             | /        |
| Co@NC     | 40              | 24              | 23             | 13       |
| CoSn@NC   | 46              | 28              | 16             | 9        |

**Table S2.** The simulated data from EIS.

| Catalysts | $R_s$ (Ohm $\text{cm}^{-2}$ ) | $R_p$ (Ohm $\text{cm}^{-2}$ ) | $Z_w$ (Ohm $\text{cm}^{-2}$ ) |
|-----------|-------------------------------|-------------------------------|-------------------------------|
| NC        | 0.71                          | 3.87                          | 1.44                          |
| Sn@NC     | 0.70                          | 3.60                          | 1.34                          |
| Co@NC     | 0.63                          | 2.90                          | 1.12                          |
| CoSn@NC   | 0.56                          | 2.66                          | 0.57                          |

**Table S3.** Summary of ORR activities of various catalysts in 0.1 M KOH.

| Catalysts                                 | Half-wave Potential (V) | Onset potential (V) | Limiting current density (mA cm <sup>-2</sup> ) | Ref.             |
|-------------------------------------------|-------------------------|---------------------|-------------------------------------------------|------------------|
| CoNi-SAs/NC                               | 0.76                    | 0.88                | 5                                               | 2                |
| Ni <sub>3</sub> C-GNRs                    | 0.77                    | 0.89                | 4.5                                             | 3                |
| MnCo <sub>2</sub> O <sub>4</sub> /NCNTs   | 0.76                    | /                   | 6.06                                            | 4                |
| Fe <sub>x</sub> Co <sub>9-x</sub> -NHCS-V | 0.80                    | /                   | /                                               | 5                |
| ZIF-67@CoTMPP (800)                       | 0.78                    | 0.85                | /                                               | 6                |
| <b>CoSn@NC</b>                            | <b>0.84</b>             | <b>0.90</b>         | <b>7.13</b>                                     | <b>this work</b> |

**Table S4.** Summary of ORR efficiency of bimetallic catalysts.

| Catalysts                            | Half-wave Potential (V) | Onset potential (V) | Limiting current density (mA cm <sup>-2</sup> ) | Ref.             |
|--------------------------------------|-------------------------|---------------------|-------------------------------------------------|------------------|
| Cu <sub>2</sub> O@Co/NC              | 0.80                    | 0.89                | 3.80                                            | 7                |
| Co <sub>4</sub> /Fe <sub>1</sub> @NC | 0.83                    | 0.98                | /                                               | 8                |
| Co-RuO <sub>2</sub> /OCNT            | 0.82                    | /                   | /                                               | 9                |
| CuCo@N/C                             | 0.78                    | 0.88                | 4.42                                            | 10               |
| MoFeC <sub>x</sub> -NC               | 0.82                    | 0.95                | /                                               | 11               |
| <b>CoSn@NC</b>                       | <b>0.84</b>             | <b>0.90</b>         | <b>7.13</b>                                     | <b>this work</b> |

**Table S5.** Summary of antibacterial activities of various catalysts.

| <b>Antibacterial agent</b> | <b>Microbial strain</b> | <b>Average inhibition diameter (mm)</b> | <b>Antimicrobial Substances</b>                   | <b>Ref.</b>      |
|----------------------------|-------------------------|-----------------------------------------|---------------------------------------------------|------------------|
| Zn-MOF                     | E. coli                 | 8.6                                     | ZnO nanoparticles                                 | 12               |
| Ag-Fe-N/C                  | E. coli                 | 3                                       | Ag nanoparticles                                  | 13               |
| (Fe/Co) Bi-MOFs            | E. coli                 | 12                                      | (Fe/Co) Bi-MOFs nanoparticles                     | 14               |
| Cu-MOF                     | E. coli                 | 11                                      | Cu nanoparticles                                  | 15               |
| Ac Zn-MOF                  | E. coli                 | 14                                      | released Zn <sup>2+</sup>                         | 16               |
| <b>CoSn@NC</b>             | <b>E. coli</b>          | <b>12</b>                               | <b>released Sn<sup>2+</sup> and generated ·OH</b> | <b>this work</b> |

**Table S6.** Comparison of MFCs performance with different cathode catalysts.

| <b>Anode</b>        | <b>Cathode</b>              | <b>External resistance (<math>\Omega</math>)</b> | <b>Output voltage (mV)</b> | <b>Power density (<math>\text{mW m}^{-2}</math>)</b> | <b>Ref.</b>      |
|---------------------|-----------------------------|--------------------------------------------------|----------------------------|------------------------------------------------------|------------------|
| Carbon paper        | $\text{Cu}_2\text{O@Co/NC}$ | 1000                                             | 430                        | 1100                                                 | 7                |
| Carbon cloth        | GO-Zn/Co (1:1)-800          | 1000                                             | 145                        | 773                                                  | 17               |
| Carbon felt         | MgO/GO                      | 1000                                             | 354                        | 755.63                                               | 18               |
| Carbon paper        | Ag/Co-N-C                   | /                                                | $502 \pm 12$               | $548 \pm 12$                                         | 19               |
| Carbon felt         | MPC-800                     | 1000                                             | 470                        | 240                                                  | 20               |
| <b>Carbon cloth</b> | <b>CoSn@NC</b>              | <b>1000</b>                                      | <b>460</b>                 | <b>1380</b>                                          | <b>this work</b> |

## Reference

1. H. Xie, D. Jiang, H. Chen, X. Ma, X. Liu, Q. Qi and Y. Wang, Electron transfer and surface activity of NiCoP-wrapped MXene: cathodic catalysts for the oxygen reduction reaction, *Nanoscale*, 2023, **15**, 7430-7437.
2. X. Han, X. Ling, D. Yu, D. Xie, L. Li, S. Peng, C. Zhong, N. Zhao, Y. Deng and W. Hu, Atomically dispersed binary Co-Ni sites in nitrogen-doped hollow carbon nanocubes for reversible oxygen reduction and evolution, *Adv. Mater.*, 2019, **31**, 1905622.
3. X. Fan, Z. Peng, R. Ye, H. Zhou and X. Guo,  $M_3C$  (M: Fe, Co, Ni) nanocrystals encased in graphene nanoribbons: An active and stable bifunctional electrocatalyst for oxygen reduction and hydrogen evolution reactions, *Acs Nano*, 2015, **9**, 7407-7418.
4. Z. Wang, J. Huang, L. Wang, Y. Liu, W. Liu, S. Zhao and Z. Liu, Cation-tuning induced d-band center modulation on Co-based spinel oxide for oxygen reduction/evolution reaction, *Angew. Chem.-Int. Edit.*, 2022, **61**, e202114696.
5. S. Li, Y. Xie, B. Lai, Y. Liang, K. Xiao, T. Ouyang, N. Li and Z. Liu, Atomic modulation of Fe-Co pentlandite coupled with nitrogen-doped carbon sphere for boosting oxygen catalysis, *Chin. J. Catal.*, 2022, **43**, 1502-1510.
6. L. Wang, X. Jin, J. Fu, Q. Jiang, Y. Xie, J. Huang and L. Xu, Mesoporous non-noble metal electrocatalyst derived from ZIF-67 and cobalt porphyrin for the oxygen reduction in alkaline solution, *J. Electroanal. Chem.*, 2018, **825**, 65-72.
7. H. Chen, D. Jiang, H. Xie, Y. Liu, S. Li and Y. Wang,  $Cu_2O@Co/N$ -doped carbon as antibacterial catalysts for oxygen reduction in microbial fuel cells, *Environ. Sci.-Nano*, 2023, **10**, 158-165.
8. A. Han, W. Sun, X. Wan, D. Cai, X. Wang, F. Li, J. Shui and D. Wang, Construction of  $Co_4$  atomic clusters to enable Fe- $N_4$  motifs with highly active and durable oxygen reduction performance, *Angew. Chem. -Int. Edit.*, 2023, e202303185.
9. Q. Lu, X. Zou, X. Wang, L. An, Z. Shao and Y. Bu, Simultaneous reactant accessibility and charge transfer engineering in Co-doped  $RuO_2$ -supported OCNT for robust rechargeable zinc-air batteries, *Appl. Catal. B-Environ.*, 2023, **325**, 122323.
10. X. Dong, J. Wang, X. Wang, J. Xu, J. Yang, W. Zeng, Y. Li, Y. Zhao, G. Huang, J. Wang and F. Pan, Bimetallic  $CuCo@nitrogen/carbon$  nanoparticles as a cathode catalyst for magnesium-air batteries, *ChemElectroChem*, 2022, **9**, e202200585.
11. X. Deng, S. Imhanria, Y. Sun, M. Zhang, Y. Cheng and W. Wang, Mo, Fe bimetallic carbide composite as high stability electrocatalyst for oxygen reduction reaction, *J. Environ. Chem. Eng.*, 2022, **10**, 108052.
12. F. Akbarzadeh, M. Motaghi, N. P. S. Chauhan and G. Sargazi, A novel synthesis of new antibacterial nanostructures based on Zn-MOF compound: design, characterization and a high performance application, *Heliyon*, 2020, **6**, e03231.
13. B. Lai, Z. Xiao, P. Jiang, Y. Xie, N. Li and Z. Liu, Two-dimensional  $Ag-Fe-N/C$  nanosheets as efficient cathode catalyst to improve power-generation performance

- of microbial fuel cells, *ChemElectroChem*, 2022, **9**, e202101699.
14. F. T. Alshorifi, S. M. El Dafrawy and A. I. Ahmed, Fe/Co-MOF nanocatalysts: greener chemistry approach for the removal of toxic metals and catalytic applications, *ACS omega*, 2022, **7**, 23421-23444.
  15. A. S. Abdelmoaty, A. A. El-Beih and A. A. Hanna, Synthesis, characterization and antimicrobial activity of copper-metal organic framework (Cu-MOF) and its modification by melamine, *J. Inorg. Organomet. Polym. Mater.*, 2022, **32**, 1778-1785.
  16. M. Nakhaei, K. Akhbari, M. Kalati and A. Phuruangrat, Antibacterial activity of three zinc-terephthalate MOFs and its relation to their structural features, *Inorg. Chim. Acta*, 2021, **522**, 120353.
  17. W. Yang, G. Chata, Y. Zhang, Y. Peng, J. Lu, N. Wang, R. Mercado, J. Li and S. Chen, Graphene oxide-supported zinc cobalt oxides as effective cathode catalysts for microbial fuel cell: High catalytic activity and inhibition of biofilm formation, *Nano Energy*, 2019, **57**, 811-819.
  18. M. Li, S. Zhou and M. Xu, Graphene oxide-supported zinc cobalt oxides as effective cathode catalysts for microbial fuel cell: High catalytic activity and inhibition of biofilm formation, *Chem. Eng. J.*, 2017, **328**, 106-116.
  19. P. Jiang, Z. Xiao, Y. Wang, N. Li and Z. Liu, Enhanced performance of microbial fuel cells using Ag nanoparticles modified Co, N co-doped carbon nanosheets as bifunctional cathode catalyst, *Bioelectrochemistry*, 2021, **138**, 107717.
  20. Z. Zha, Z. Zhang, P. Xiang, H. Zhu, X. Shi and S. Chen, Porous graphitic carbon from mangosteen peel as efficient electrocatalyst in microbial fuel cells. *Sci. Total Environ.*, 2021, **764**, 142918.
